# Supplementary material for: Water-soluble dinuclear iridium(iii) and ruthenium(ii) bis-terdentate complexes: photophysics and electrochemiluminescence
Source: Royal Society of Chemistry journal article supplement (doi:10.1039/d2dt02104h), 2022-01-01
Supplement: d2dt02104h1.pdf [file d2dt02104h1.pdf]

## Supporting Information

### **Water-soluble Dinuclear Iridium(III) and Ruthenium(II) Bis-terdentate Complexes: Photophysics and Electrochemiluminescence**

Bingqing Liu,<sup>a</sup> Xin Yang,<sup>b</sup> Mahammed Jabed,<sup>a</sup> Svetlana Kilina,<sup>a</sup> Zhengchun Yang,<sup>\*,b</sup> Wenfang Sun<sup>\*,a</sup>

<sup>a</sup> Department of Chemistry and Biochemistry, North Dakota State University, Fargo, ND 58108-6050, USA

<sup>b</sup> School of Integrated Circuit Science and Engineering, Tianjin University of Technology, Tianjin 300384, P. R. China

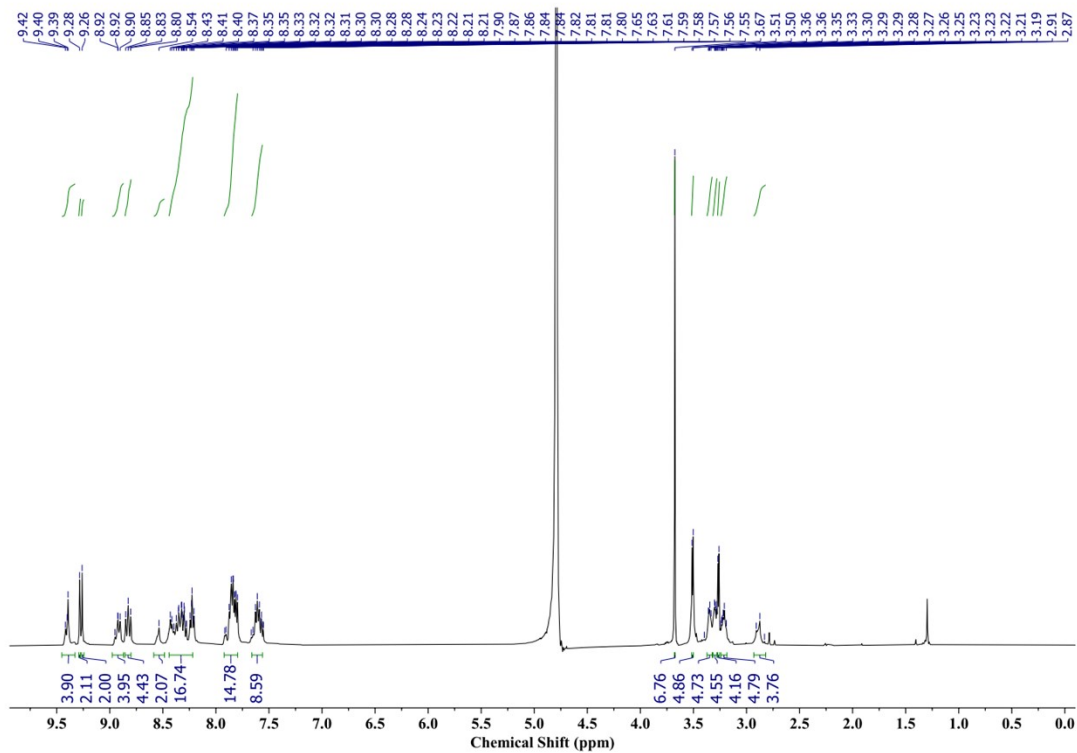

Figure S1.  $^1\text{H}$  NMR spectrum of complex **1** in  $\text{D}_2\text{O}$  (400 MHz).

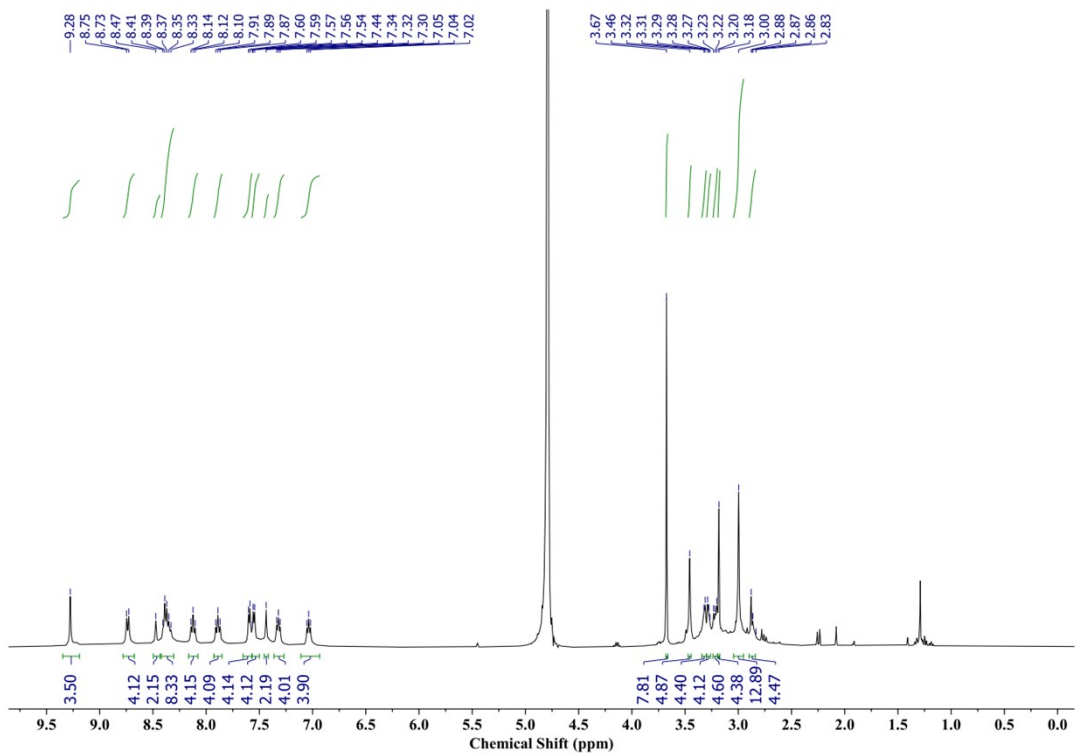

Figure S2.  $^1\text{H}$  NMR spectrum of **2** in  $\text{D}_2\text{O}$  (400 MHz).

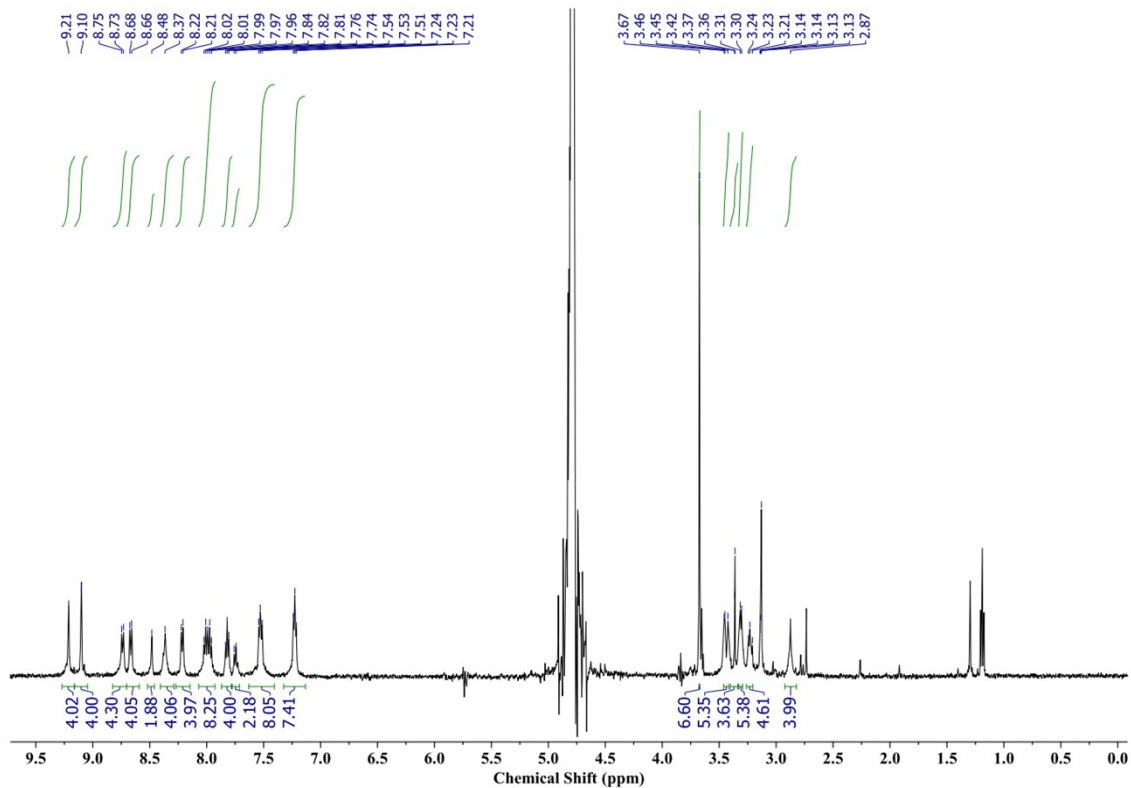

Figure S3.  $^1\text{H}$  NMR spectrum of **3** in  $\text{D}_2\text{O}$  (500 MHz).

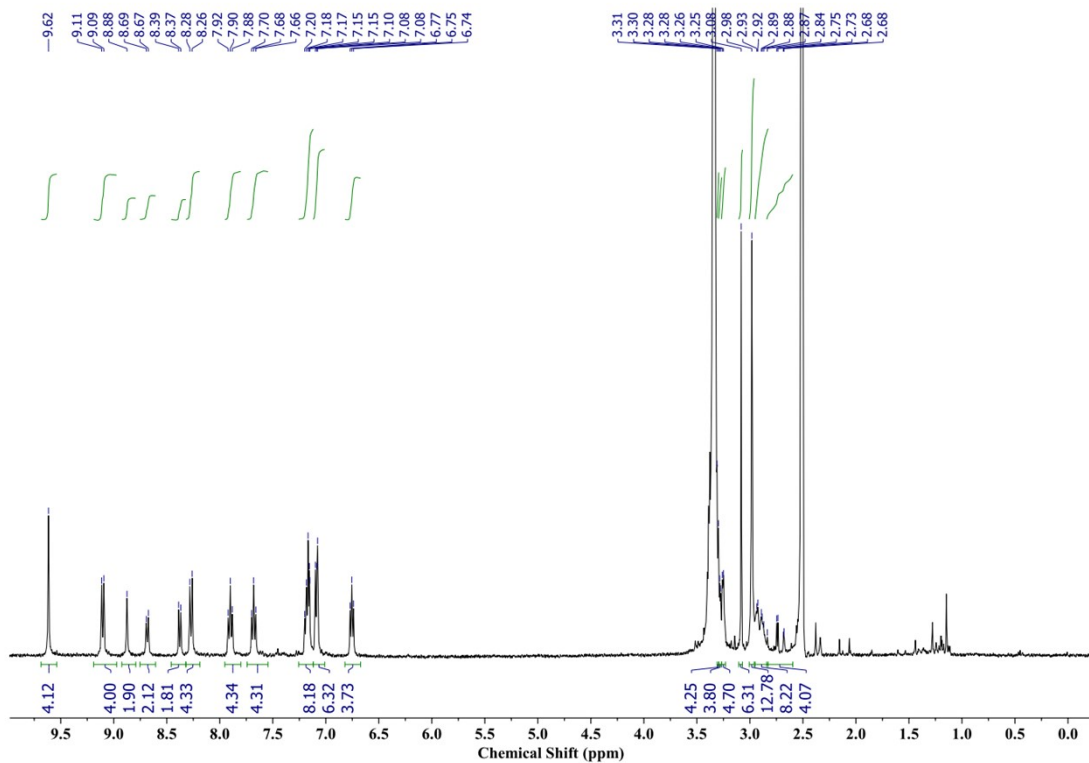

Figure S4.  $^1\text{H}$  NMR spectrum of **4** in  $\text{DMSO}-d_6$  (400 MHz).

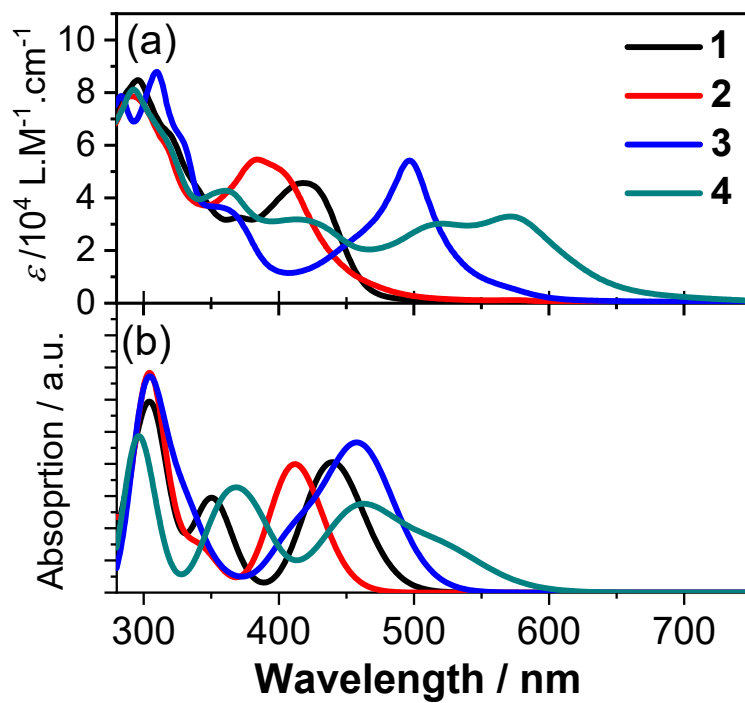

**Fig. S5.** (a) Experimental and (b) calculated absorption spectra of **1-4** in water. The two Ir(III) complexes **1** and **2** were calculated using PBE0 and the two Ru(II) complexes **3** and **4** were calculated using the B3LYP functional.

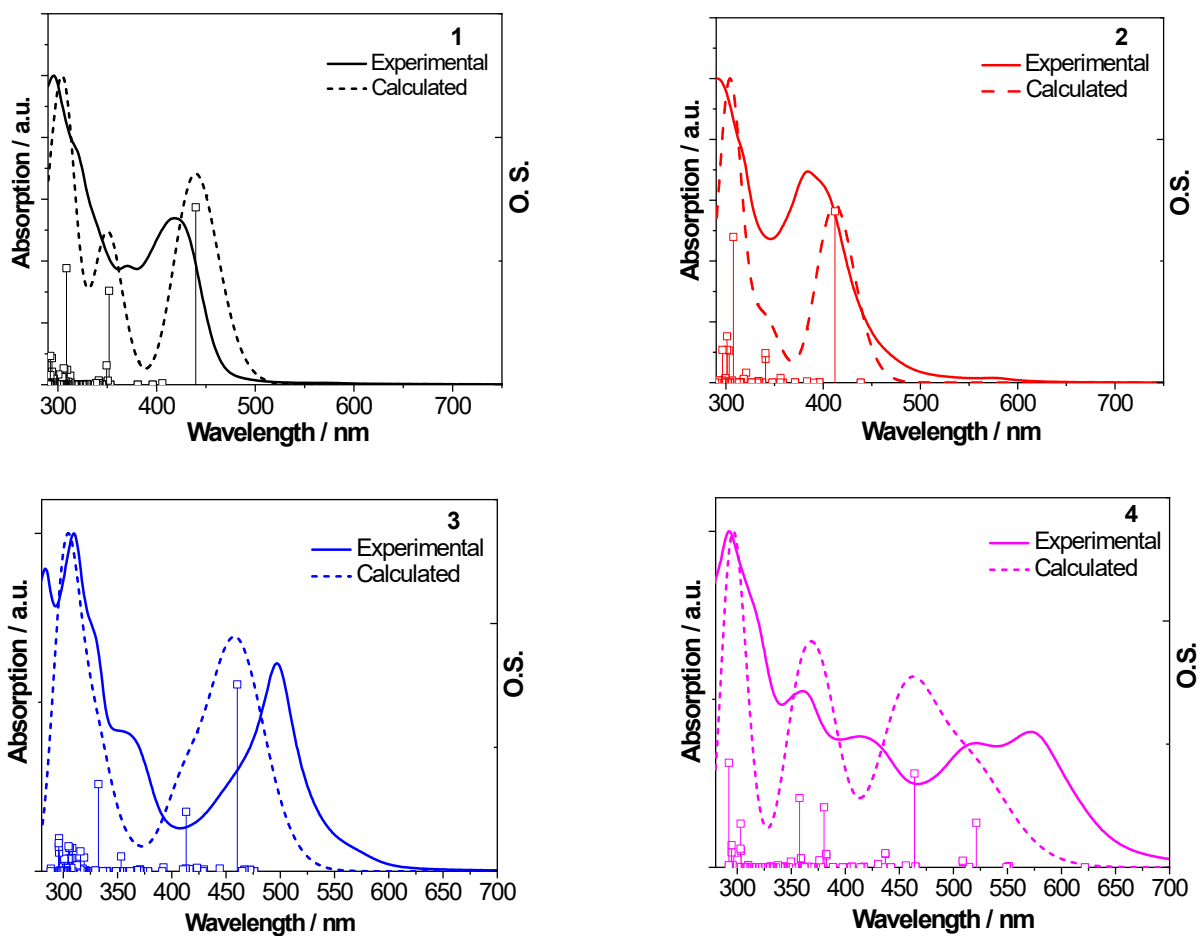

**Fig. S6.** Comparison of the normalized experimental and calculated absorption spectra for complexes **1-4** in water. **1** and **2** were calculated using the PBE0 functional and complexes **3** and **4** were calculated using the B3LYP functional.

**Table S1.** Natural transition orbitals of the high-energy transitions for complex **1**. The TDDFT calculations were conducted using PBE0 functional, LAN2dz/6-31G\* basis set, and water as solvent.

| $S_n$ and Properties              | Hole                                                                                | Electron                                                                              |
|-----------------------------------|-------------------------------------------------------------------------------------|---------------------------------------------------------------------------------------|
| $S_9$<br>352 nm<br>$f = 0.759$    | 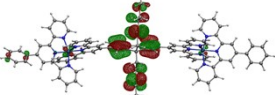   |    |
| $S_{11}$<br>349 nm<br>$f = 0.156$ |    |    |
| $S_{14}$<br>342 nm<br>$f = 0.022$ |    |    |
| $S_{15}$<br>342 nm<br>$f = 0.027$ |   |   |
| $S_{16}$<br>341 nm<br>$f = 0.035$ |  |  |
| $S_{41}$<br>313 nm<br>$f = 0.023$ |  |  |
| $S_{49}$<br>309 nm<br>$f = 0.942$ |  |  |

**Table S2.** Natural transition orbitals of the high-energy transitions for complex **2**. The TDDFT calculations were conducted using PBE0 functional, LAN2dz/6-31G\* basis set, and water as solvent.

|                                          | Hole | Electron |
|------------------------------------------|------|----------|
| S <sub>17</sub><br>341 nm<br>$f = 0.194$ |      |          |
| S <sub>18</sub><br>341 nm<br>$F = 0.243$ |      |          |
| S <sub>36</sub><br>308 nm<br>$f = 1.199$ |      |          |
| S <sub>40</sub><br>303 nm<br>$f = 0.263$ |      |          |

**Table S3.** Natural transition orbitals of the high-energy transitions for complex **3**. The TDDFT calculations were conducted using B3LYP functional, LAN2dz/6-31G\* basis set, and water as solvent.

|                                           | Hole | Electron |
|-------------------------------------------|------|----------|
| S <sub>41</sub><br>353 nm<br>$f = 0.119$  |      |          |
| S <sub>55</sub><br>332 nm<br>$f = 0.704$  |      |          |
| S <sub>115</sub><br>296 nm<br>$f = 0.266$ |      |          |

**Table S4.** Natural transition orbitals of the high-energy transitions for complex 4. The TDDFT calculations were conducted using B3LYP functional, LAN2dz/6-31G\* basis set, and water as solvent.

|                                    | Hole                                                                              | Electron                                                                            |
|------------------------------------|-----------------------------------------------------------------------------------|-------------------------------------------------------------------------------------|
| $S_{39}$<br>380 nm<br>$f = 0.488$  | 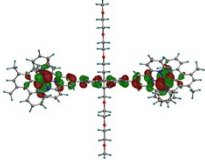 |  |
| $S_{53}$<br>358 nm<br>$f = 0.563$  |  |  |
| $S_{129}$<br>292 nm<br>$f = 0.849$ |  |  |



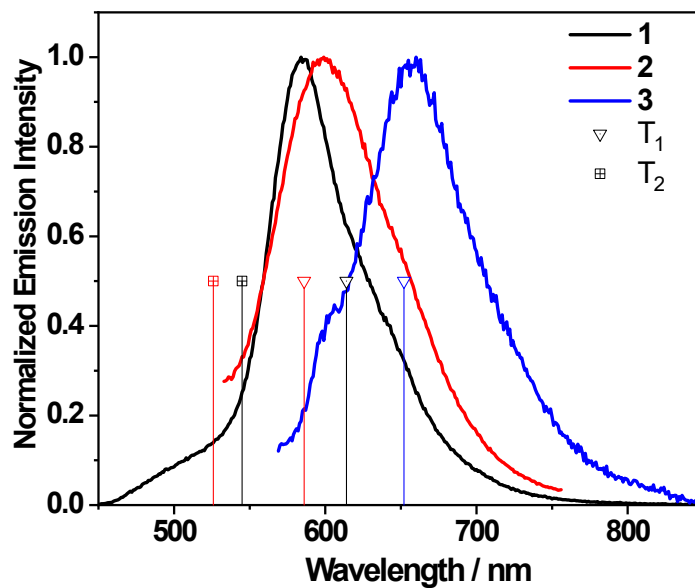

**Fig. S7.** Experimental emission spectra and calculated emission energies for complexes **1-3** in water. Emission energies are calculated by optimizing the triplet state ( $T_1$ ) using analytical TDDFT method, the PBE0 functional, LAN2DZ/6-31G\* basis sets and CPCM solvation method with water being used as a solvent. Bar heights are chosen randomly for a better representation.

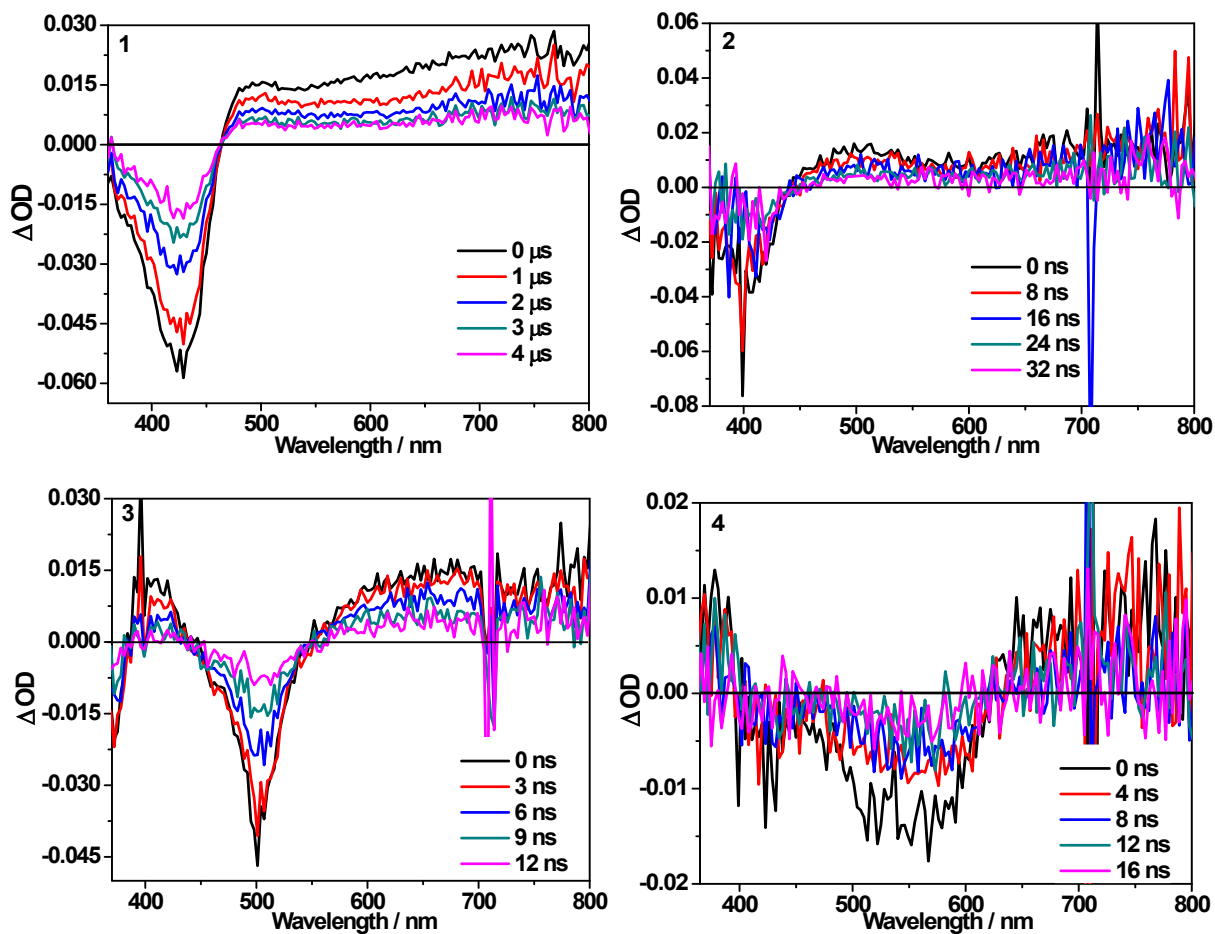

**Fig. S8.** Time-resolved ns-TA spectra of complexes 1–4 in acetonitrile at room temperature after 355 nm laser excitation.  $A_{355} = 0.4$  in a 1 cm cuvette.
